# Supplementary material for: Popliteus impingement after TKA may occur with well-sized prostheses
Source: Springer Nature journal article supplement (doi:10.1007/s00167-016-4330-8), 2016-09-26
Supplement: MOESM5 [file 10748476]

**Table A1: Mean posterior translation of the popliteus tendon at the tibial plateau level (in mm\*)**

| Flexion angle | Normosized TKA (1) |               | Oversized TKA (2) |              | Undersized TKA (3) |               |
|---------------|--------------------|---------------|-------------------|--------------|--------------------|---------------|
|               | mean $\pm$ SD      | (Min – Max)   | mean $\pm$ SD     | (Min – Max)  | mean $\pm$ SD      | (Min – Max)   |
| 0°            | 4.1 $\pm$ 2.0      | (1.7 – 7.7)   | 15.8 $\pm$ 3.0    | (9.8 – 19.5) | -1.1 $\pm$ 1.2     | (-3.0 – 0.1)  |
| 20°           | 3.5 $\pm$ 2.2      | (0.7 – 7.0)   | 10.5 $\pm$ 2.0    | (7.8 – 12.8) | -0.5 $\pm$ 1.0     | (-1.8 – 0.7)  |
| 40°           | 2.7 $\pm$ 0.6      | (1.5 – 3.3)   | 11.8 $\pm$ 1.3    | (9.0 – 13.4) | -3.0 $\pm$ 1.8     | (-6.6 – -1.7) |
| 60°           | 1.7 $\pm$ 0.3      | (1.2 – 2.0)   | 8.5 $\pm$ 0.7     | (7.2 – 8.3)  | -5.4 $\pm$ 1.3     | (-6.5 – -2.6) |
| 80°           | 1.2 $\pm$ 0.9      | (0.5 – 2.9)   | 8.8 $\pm$ 0.3     | (8.2 – 9.2)  | -3.0 $\pm$ 1.6     | (-5.3 – -0.6) |
| 100°          | -2.0 $\pm$ 0.7     | (-2.7 – -0.7) | 4.6 $\pm$ 0.9     | (3.1 – 6.0)  | -2.7 $\pm$ 1.4     | (-4.6 – -0.9) |
| 120°          | -3.2 $\pm$ 0.4     | (-3.7 – -2.6) | 3.4 $\pm$ 0.7     | (2.3 – 4.2)  | 0.4 $\pm$ 0.1      | (0.2 – 0.6)   |
| 140°          | -2.9 $\pm$ 0.5     | (-3.6 – -2.1) | 4.3 $\pm$ 0.8     | (2.9 – 5.3)  | -0.6 $\pm$ 0.4     | (-1.0 – 0.0)  |

\* positive value means posterior deviation
