# Supplementary material for: Popliteus impingement after TKA may occur with well-sized prostheses
Source: Springer Nature journal article supplement (doi:10.1007/s00167-016-4330-8), 2016-09-26
Supplement: MOESM6 [file 10748476]

**Table A2: Mean lateral translation of the popliteus tendon after TKA**

| Flexion angle | Normosized TKA |               | Oversized TKA  |               | Undersized TKA |               |
|---------------|----------------|---------------|----------------|---------------|----------------|---------------|
|               | mean $\pm$ SD  | (Min – Max)   | mean $\pm$ SD  | (Min – Max)   | mean $\pm$ SD  | (Min – Max)   |
| 0°            | -3.8 $\pm$ 1.1 | (-5.6 – -2.1) | -3.7 $\pm$ 2.6 | (-7.6 – 1.4)  | -2.5 $\pm$ 1.7 | (-4.5 – 0.0)  |
| 20°           | -3.4 $\pm$ 0.9 | (-4.6 – -2.0) | 0.2 $\pm$ 0.5  | (-0.5 – 0.9)  | -0.2 $\pm$ 0.9 | (-1.4 – 1.0)  |
| 40°           | -3.5 $\pm$ 0.9 | (-4.9 – -2.0) | -2.0 $\pm$ 1.4 | (-3.4 – 0.1)  | -0.5 $\pm$ 1.3 | (-1.6 – 1.9)  |
| 60°           | 0.0 $\pm$ 0.7  | (-0.9 – 1.9)  | -1.0 $\pm$ 3.1 | (-6.1 – 1.9)  | 0.4 $\pm$ 1.3  | (-2.0 – 2.5)  |
| 80°           | -0.5 $\pm$ 0.7 | (-1.4 – 0.6)  | -2.7 $\pm$ 2.8 | (-7.0 – -0.2) | 0.8 $\pm$ 0.5  | (0.0 – 2.5)   |
| 100°          | -0.9 $\pm$ 0.7 | (-1.6 – 0.0)  | 0.5 $\pm$ 1.9  | (-3.0 – 2.3)  | -0.6 $\pm$ 0.9 | (-1.7 – 0.8)  |
| 120°          | -0.5 $\pm$ 1.5 | (-2.1 – 2.3)  | -1.2 $\pm$ 2.5 | (-5.2 – 1.7)  | -1.3 $\pm$ 0.4 | (-1.8 – -0.6) |
| 140°          | -1.4 $\pm$ 2.4 | (-3.7 – 3.0)  | -0.9 $\pm$ 1.4 | (-2.9 – 0.8)  | -1.3 $\pm$ 0.5 | (-2.4 – -0.8) |
